# Supplementary material
Source: publisher figshare collection journal article supplement (https://aacr.figshare.com/articles/dataset/_/22490200)

### Antitumor assessment study (UMUC3)

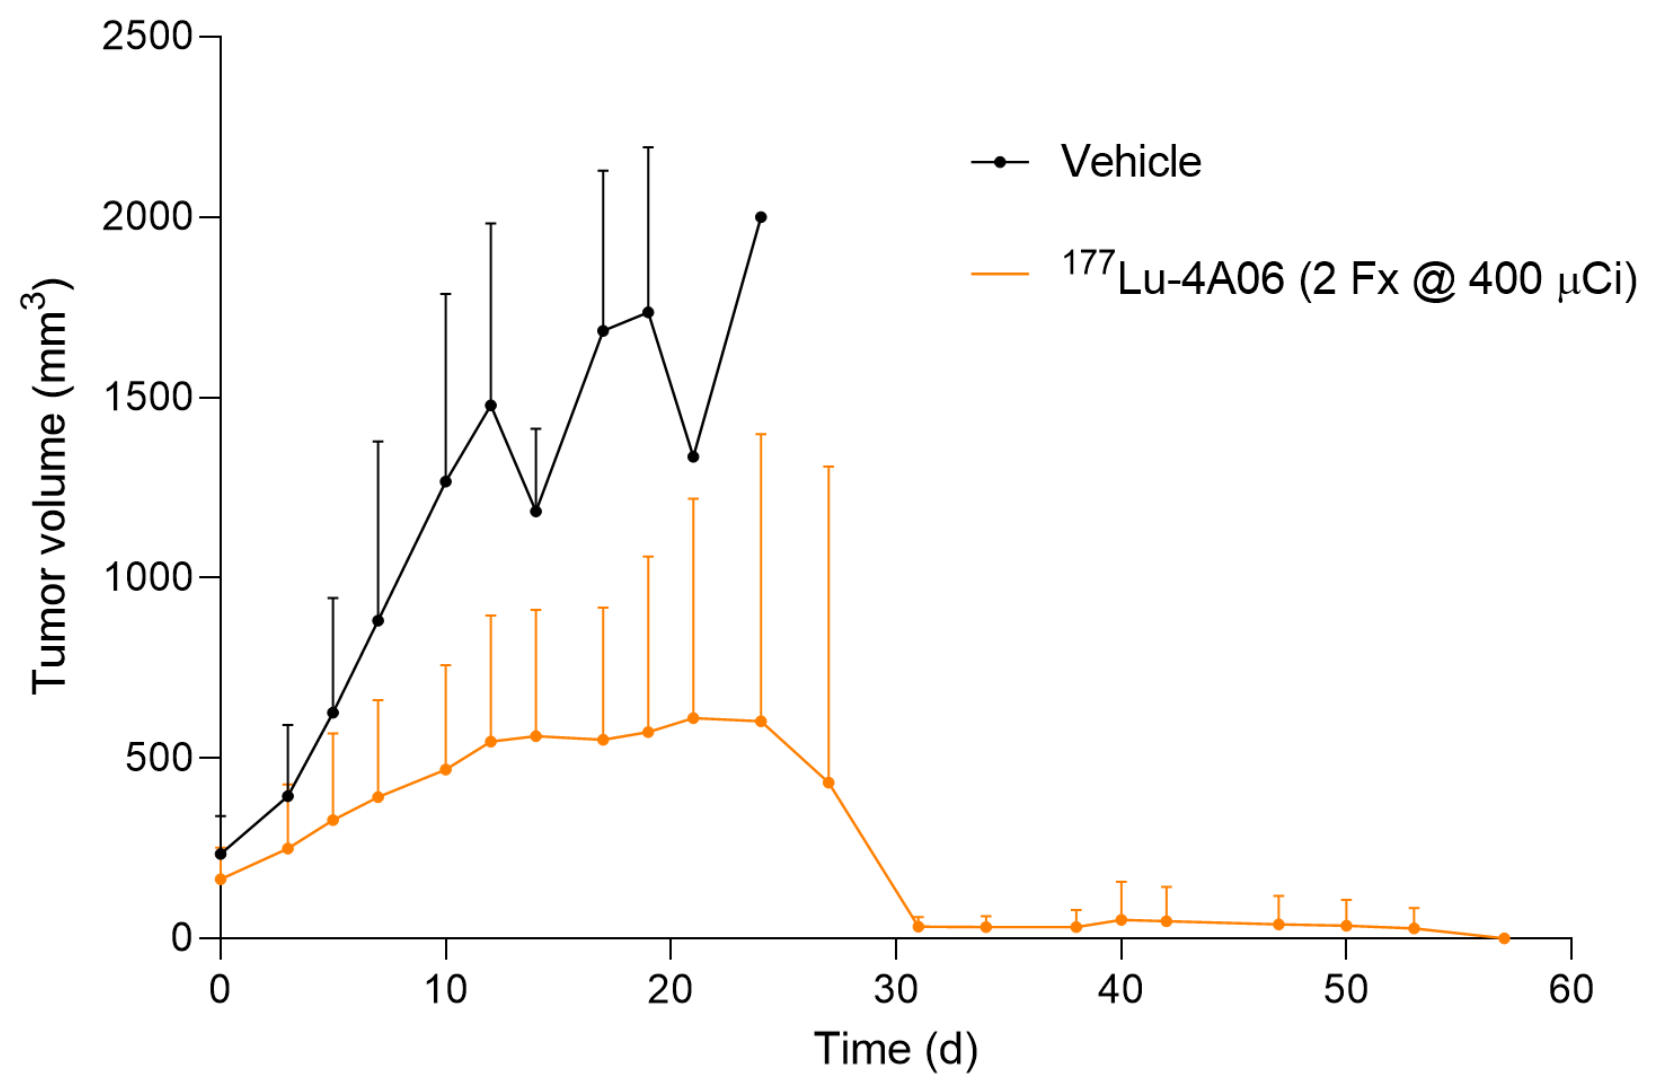

Supplement: Supplementary file 1 [file 39941827]
